# Supplementary material for: Synthesis and Antioxidant Activity Evaluation of New Compounds from Hydrazinecarbothioamide and 1,2,4-Triazole Class Containing Diarylsulfone and 2,4-Difluorophenyl Moieties
Source: PubMed Central journal article supplement (PMC4100188; doi:10.3390/ijms150610908), 2014-06-17
Supplement: ijms-15-10908-s001.pdf [file ijms-15-10908-s001.pdf]

## Supplementary Information

**Table S1.** The estimated values of logP and *in silico* permeability across model interfaces.

| Name | logP | Human Jejunal Effective Permeability (cm/s × 10 <sup>4</sup> ) | Permeability (MDCK) (cm/s × 10 <sup>7</sup> ) | Permeability (Rabbit Cornea) (cm/s × 10 <sup>7</sup> ) | Permeability (Skin) (cm/s × 10 <sup>7</sup> ) |
|------|------|----------------------------------------------------------------|-----------------------------------------------|--------------------------------------------------------|-----------------------------------------------|
| 4    | 3.46 | 3.34                                                           | 71.79                                         | 71.94                                                  | 0.17                                          |
| 5    | 4.01 | 3.57                                                           | 59.96                                         | 87.65                                                  | 0.05                                          |
| 6    | 4.13 | 3.75                                                           | 52                                            | 84.62                                                  | 0.05                                          |
| 7    | 3.82 | 4.47                                                           | 88.73                                         | 204.61                                                 | 42.42                                         |
| 8    | 4.42 | 5.07                                                           | 89.45                                         | 238.88                                                 | 37.93                                         |
| 9    | 4.52 | 5.37                                                           | 74.74                                         | 233.1                                                  | 45.62                                         |
| 10   | 4.71 | 5.04                                                           | 236.57                                        | 208                                                    | 1.69                                          |
| 11   | 5.27 | 5.64                                                           | 249.17                                        | 280.16                                                 | 15.74                                         |
| 12   | 5.4  | 5.94                                                           | 230.41                                        | 249.71                                                 | 15.02                                         |
| 13   | 4.95 | 5.19                                                           | 290.51                                        | 208.37                                                 | 7.16                                          |
| 14   | 5.5  | 5.78                                                           | 306.07                                        | 262.44                                                 | 64.34                                         |
| 15   | 5.63 | 6.08                                                           | 287.23                                        | 243.42                                                 | 67.2                                          |

**Table S2.** The estimated solubility in water and biorelevant gastro-intestinal fluids.

| Name | Solubility Water (mg/mL) | Intrinsic Solubility (mg/mL) | Solubility at pH = 7.4 (mg/mL) | Solubility in FaSSGF (mg/mL) | Solubility in FaSSIF (mg/mL) | Solubility in FeSSIF (mg/mL) |
|------|--------------------------|------------------------------|--------------------------------|------------------------------|------------------------------|------------------------------|
| 4    | 0.00128                  | 0.00116                      | 0.00154                        | 0.01030                      | 0.03820                      | 0.09760                      |
| 5    | 0.00066                  | 0.00058                      | 0.00075                        | 0.00546                      | 0.02320                      | 0.06990                      |
| 6    | 0.00079                  | 0.00071                      | 0.00087                        | 0.00475                      | 0.02100                      | 0.06440                      |
| 7    | 0.00138                  | 0.00115                      | 0.00239                        | 0.01400                      | 0.30900                      | 0.09010                      |
| 8    | 0.00070                  | 0.00051                      | 0.00138                        | 0.00579                      | 0.17400                      | 0.06340                      |
| 9    | 0.00080                  | 0.00060                      | 0.00144                        | 0.00495                      | 0.15600                      | 0.05630                      |
| 10   | 0.00037                  | 0.00037                      | 0.00037                        | 0.00721                      | 0.01800                      | 0.01730                      |
| 11   | 0.00019                  | 0.00019                      | 0.00019                        | 0.00360                      | 0.01120                      | 0.01230                      |
| 12   | 0.00026                  | 0.00026                      | 0.00026                        | 0.00308                      | 0.01020                      | 0.01140                      |
| 13   | 0.00039                  | 0.00039                      | 0.00039                        | 0.00535                      | 0.01350                      | 0.01410                      |
| 14   | 0.00021                  | 0.00021                      | 0.00021                        | 0.00275                      | 0.00874                      | 0.01020                      |
| 15   | 0.00028                  | 0.00028                      | 0.00028                        | 0.00234                      | 0.00797                      | 0.00942                      |

FaSSGF—Fast State Simulated Gastric Fluid; FaSSIF—Fast State Simulated Intestinal Fluid; FeSSIF—Fed State Simulated Intestinal Fluid.

Portions of these results were generated by ADMET Predictor™ software provided by Simulations Plus, Inc., Lancaster, CA, USA.

© 2014 by the authors; licensee MDPI, Basel, Switzerland. This article is an open access article distributed under the terms and conditions of the Creative Commons Attribution license (<http://creativecommons.org/licenses/by/3.0/>).
